# Supplementary material for: Titanate nanotube thin films via alternate layer depositionElectronic supplementary information (ESI) available: XRD patterns of TNT, surface and cross-sectional SEM images of thin films after 5 and 10 cycles. See http://www.rsc.org/suppdata/cc/b3/b316924c/
Source: Royal Society of Chemistry journal article supplement (doi:10.1039/b316924c), 2004-01-01
Supplement: b316924c.pdf [file b316924c.pdf]

Titanate nanotube thin films via alternate layer deposition

Hiromasa Tokudome and Masahiro Miyauchi

R&D center, TOTO Ltd., 2-8-1 Honson, Chigasaki, Kanagawa 253-8577, Japan.

E-mail: masahiro.miyauchi@toto.co.jp

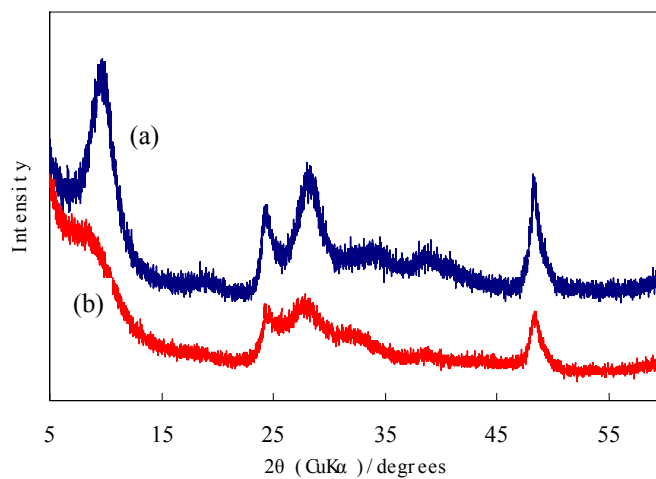

Fig.S1 XRD patterns of (a) as-prepared TNT and (b) TNT dispersed in aqueous TBAOH solution.

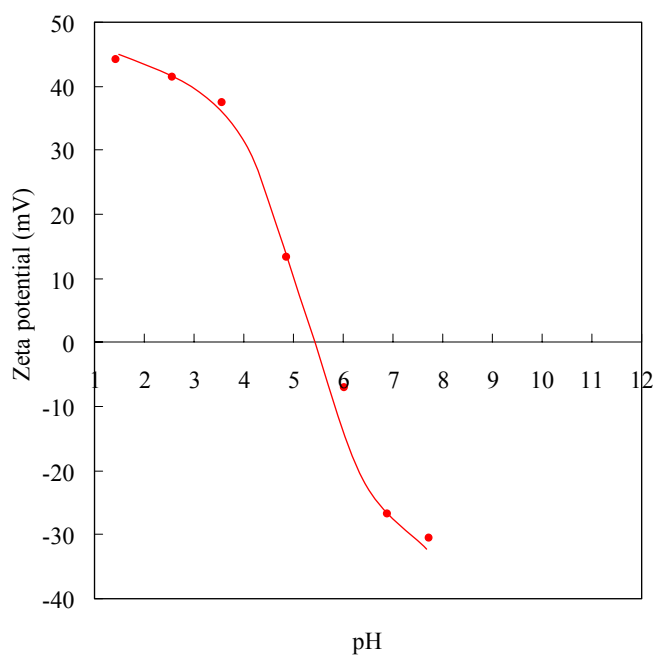

Fig.S2 Zeta potential of TNT colloid in aqueous solution.

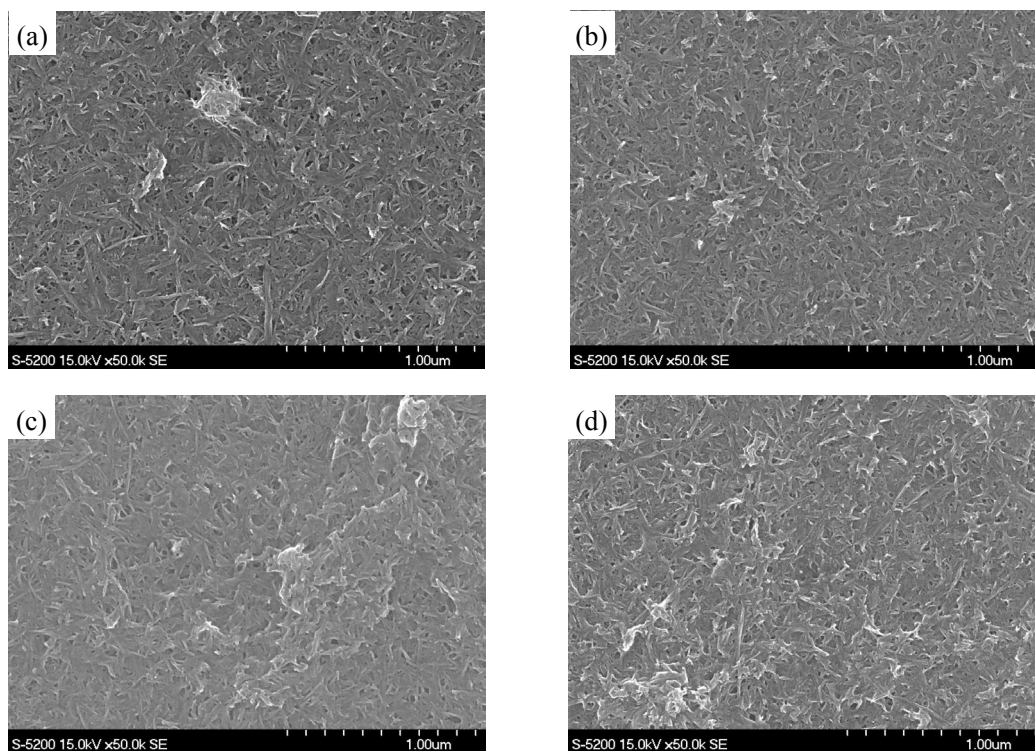

Fig.S3 Surface SEM images of PEI/(TNT/PDDA)<sub>4</sub>TNT films: (a) as-deposited; (b) after UV irradiation, and PEI/(TNT/PDDA)<sub>9</sub>TNT film: (c) as-deposited; (d) after UV irradiation.

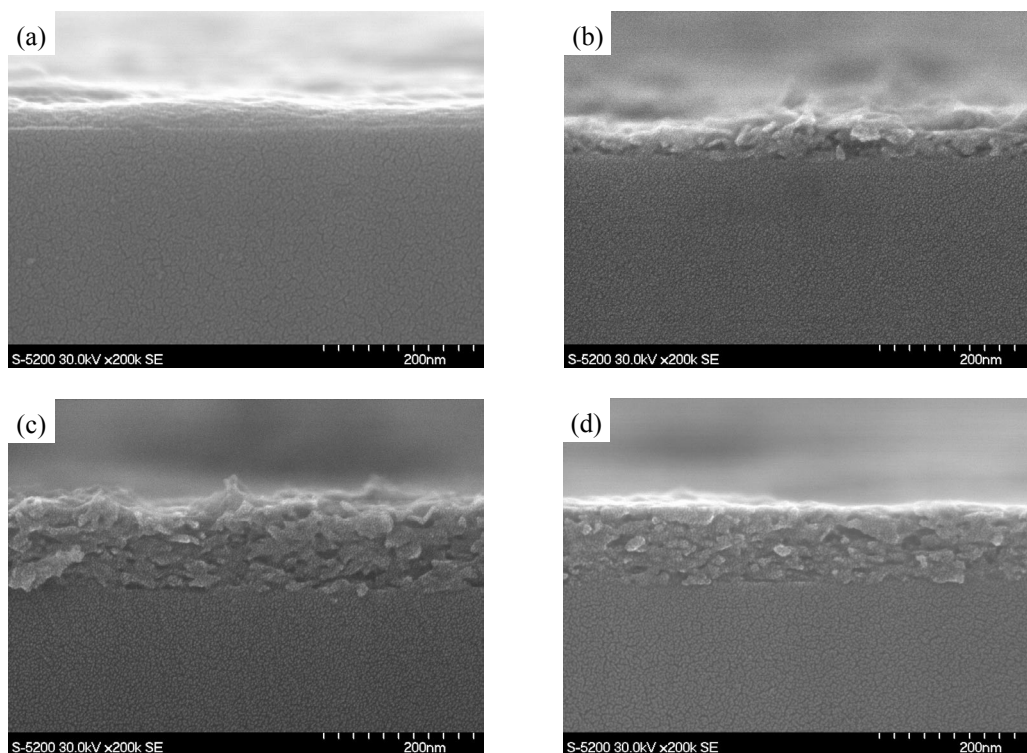

Fig.S4 Cross-sectional SEM images of PEI/(TNT/PDDA)<sub>4</sub>TNT films: (a) as-deposited; (b) after UV irradiation, and PEI/(TNT/PDDA)<sub>9</sub>TNT film: (c) as-deposited; (d) after UV irradiation.

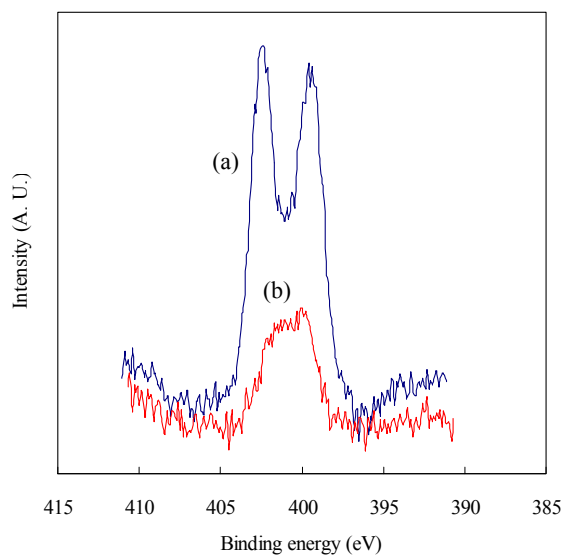

Fig.S5 XPS spectra for N-1s orbital of PEI(TNT/PDDA)<sub>9</sub>TNT film, (a) before UV irradiation ; both of peaks at 400 and 403.3eV were assigned to polycation, and (b) after UV irradiation ; the peak at 401.5eV was assigned to NH<sub>4</sub><sup>+</sup>.
